# Supplementary material for: Locating protein-coding sequences under selection for additional, overlapping functions in 29 mammalian genomes
Source: HighWire-hosted journal article supplement (doi:10.1101/gr.108753.110), 2011-10-12
Supplement: LinMF_SCE_Supplement.pdf [file LinMF_SCE_Supplement.pdf]

## Supplementary Materials for Lin *et al.* (2010)

### Locating protein-coding sequences under selection for additional, overlapping functions in 29 mammalian genomes

#### Table of Contents

|      |                                                                              |    |
|------|------------------------------------------------------------------------------|----|
| S1.  | Alignment coverage for CCDS ORFs .....                                       | 2  |
| S2.  | Phylogenetic codon model parameterization and estimation.....                | 3  |
| S3.  | Additional benchmarks of the combined window testing procedure.....          | 4  |
| S4.  | Permutation tests for <i>BRCA1</i> .....                                     | 5  |
| S5.  | Proportion of significant windows/genes on each chromosome .....             | 6  |
| S6.  | Sequence composition and codon usage in SCEs .....                           | 7  |
| S7.  | Characteristics of genes containing SCEs.....                                | 12 |
| S8.  | Enrichment of exonic splicing enhancer and miRNA target motifs in SCEs ..... | 15 |
| S9.  | Preliminary assessment of novel dual-coding ORFs associated with SCEs .....  | 16 |
| S10. | A to I editing sites in SCEs.....                                            | 19 |
| S11. | RNA structures in SCEs .....                                                 | 20 |
| S12. | Nucleosome positioning in exons containing SCEs.....                         | 23 |
| S13. | BED files for synonymous constraint elements.....                            | 24 |
| S14. | References .....                                                             | 24 |

## S1. Alignment coverage for CCDS ORFs

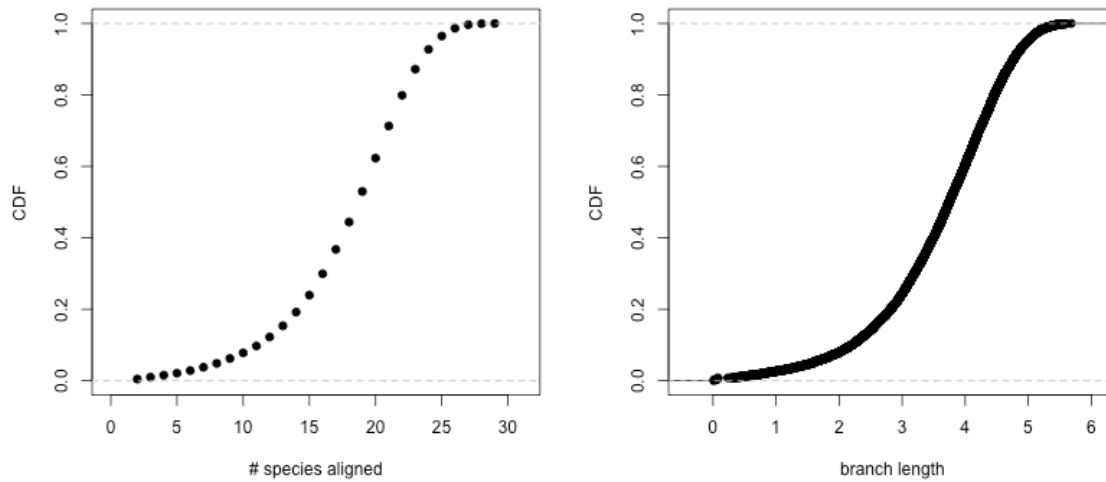

**Supplementary Figure 1. Alignment coverage for CCDS ORFs.** Each plot shows the cumulative proportion of 16,939 CCDS ORFs with a given number of species aligned at 80% of nucleotide positions or more (left), including human, or the total branch length of the aligned species (right), in codon substitutions per codon site.

## S2. Phylogenetic codon model parameterization and estimation

During the initial design of this study, we explored two ways to parameterize the phylogenetic codon models used as null models, which differ in how they determine the entries of the codon rate matrix  $Q$ .

1. M0 uses two parameters:  $\kappa$ , representing the transition/transversion rate ratio, and  $\omega$ , representing the nonsynonymous/synonymous rate ratio. Only rate matrix entries corresponding to single-nucleotide substitutions have nonzero rates (Yang *et al.* 2000, Goldman and Yang 1994).
2. The empirical codon model (ECM) uses 1,830 parameters representing independent estimates for all symmetric ‘exchangeabilities’ among the 61 codons, with possibly nonzero values for all rate matrix entries (Kosiol *et al.* 2007).

Additionally, both parameterizations include 60 parameters for the codon equilibrium frequencies and 57 branch length parameters for the 29 mammals.

We estimated the parameters with an expectation-maximization algorithm (Siepel and Haussler 2004). In each M-step, we updated the ECM exchangeability parameters (if applicable) using a spectral approximation method (Arvestad and Bruno 1997), and all other parameters by gradient ascent on the expected log-likelihood function.

For the ORF-specific models, there is insufficient data to fully re-estimate the ECM. Instead, we used the ORFeome-wide exchangeability parameters, adjusted with a single scale factor on all non-synonymous rates, as suggested by the “ECM+ $\omega$ ” parameterization of Kosiol *et al.* (2007), optimized by gradient ascent in the M-step for each ORF. The chromosome X null model is also an ECM+ $\omega$  model using the ORFeome-wide exchangeabilities, with  $\omega$  re-estimated based on a sample of sites on that chromosome.

We obtained maximum likelihood estimates of  $\lambda_s$  and  $\lambda_n$  in any individual window using cyclic coordinate ascent on the likelihood function directly.

### S3. Additional benchmarks of the combined window testing procedure

We performed several empirical benchmarks to ensure that our combined window testing procedure achieves high specificity. In particular, we wished to ensure that an unexpectedly high false discovery rate could not result from (1) violations of the asymptotic assumptions underlying the LRT method (Whelan and Goldman 1999), (2) violations of the null model assumptions, such as random site-to-site rate variation (Pond and Muse 2005), or (3) failure of the Benjamini-Hochberg procedure (BH) to properly correct for multiple testing given the strong correlations between sliding windows (where consecutive windows overlap by two-thirds of their length). While the BH procedure accommodates such positive dependencies (Benjamini and Yekutieli 2001, Storey and Tibshirani 2003), the correlations in our data arising from overlapping sliding windows are stronger than in typical previous applications of the procedure.

**Simulated alignment.** First, we generated an alignment of 50,000 codon sites according to the ORFeome-wide null model. The simulated alignment had a randomly chosen subset of 19 of the 29 mammalian species (the median number of aligned species for CCDS ORFs). We then ran the full sliding window testing procedure on this alignment at 15-codon resolution, sliding by one-third of the window length. Since the alignment is simulated according to the null model, the procedure should not call any windows significant. Without multiple testing correction, 119 of 9,358 (1.3%) of windows in the simulated alignment had significantly reduced synonymous rate estimates at  $P < 0.01$ . As expected, BH adjusted all of these to non-significance. This means it is unlikely that problems with the sliding window procedure or assumptions underlying the LRT framework lead to a much higher-than-nominal false positive rate for our approach.

**Shuffled ORF alignments.** Second, we ran the full procedure on shuffled versions of the chromosome 17 ORFs. (Due to computational requirements, we used chromosome 17 as a small-scale benchmark of interest since it includes both *BRCA1* and the HoxB cluster.) For each CCDS ORF on chromosome 17, we took its alignment and shuffled its codon sites in random order (reordering nucleotide columns in atomic groups of 3, in the correct reading frame). Thus, for each ORF we had a shuffled version that preserves its sequence composition and site-to-site evolutionary rate variation, but randomizes out the immediate adjacency of slowly evolving sites expected in an overlapping functional element. We then applied the full testing procedure used in the real analysis (with criteria on  $\lambda_s^{\text{ome}}$ ,  $\lambda_s^{\text{ORF}}$ , and  $\lambda_n^{\text{ome}}$ , followed by multiple testing corrections).

In these shuffled alignments, 0.086% of permuted 15-codon windows were called significant, compared to 1.48% of windows in the real chromosome 17 ORFs (a 17-fold difference). Note that while this permutation experiment leads to an empirically estimated FDR of ~6%, this does not mean that BH failed to control FDR at 1%, since the underlying hypothesis tests are for deviation from a null model that does not incorporate the site-to-site rate variation seen in the real data (which is preserved by the shuffling). This means it is unlikely that (unlocalized) site-to-site rate variation leads to a much higher-than-nominal false positive rate for our approach.

**Non-overlapping windows.** Lastly, we ran BH on non-overlapping windows in the real alignments (every third window from the raw data). The resulting proportion of significant windows is *higher* in this case than with overlapping windows (2.09% vs. 1.72% at 15-codon resolution), with somewhat higher median  $\lambda_s^{\text{ome}}$  (0.2787 vs. 0.2572), and significant windows falling in a smaller proportion of CCDS genes (30% vs. 36%). This means it is unlikely that the BH procedure is badly led astray by the correlations arising from overlapping sliding windows; instead, it suggests that BH properly corrects for multiple testing in both cases, but the resolution and sensitivity of the combined testing procedure are predictably reduced without the overlapping sliding windows.

Overall, these benchmarks strongly confirm that our combined testing procedure achieves high specificity in identifying windows with localized reductions in estimated synonymous substitution rates.

#### S4. Permutation tests for *BRCA1*

In their criticism of an earlier study on putative synonymous constraint in *BRCA1*, Schmid and Yang (2008) specifically raised concerns about statistical significance in sliding window procedures. The above benchmarks argue that our approach effectively addresses such concerns for our overall dataset. To further ensure the robustness of our results for *BRCA1*, we performed additional permutation tests specifically for this gene.

We generated 1,000 shuffled versions of the *BRCA1* ORF, as described above, and applied our full sliding window testing procedure to each one, which called significant windows in only 2 of the 1,000 shuffled ORFs. Furthermore, none of the 359,000 permuted windows tested in this experiment received a higher likelihood ratio for synonymous rate reduction (based on the ORF-specific null model) than the most significant window in the real data. This strongly confirms that the region identified in the real data indeed represents a highly significant, localized reduction in the synonymous substitution rate, and not merely an artifact of the sliding window procedure.

## S5. Proportion of significant windows/genes on each chromosome

|    | Windows |               | Genes |               |
|----|---------|---------------|-------|---------------|
|    | #       | % Significant | #     | % Significant |
| 1  | 186,745 | 1.69%         | 1,848 | 35.2%         |
| 2  | 116,855 | 2.04%         | 1,039 | 41.6%         |
| 3  | 100,350 | 1.92%         | 919   | 41.3%         |
| 4  | 67,223  | 2.01%         | 626   | 37.4%         |
| 5  | 80,360  | 2.08%         | 731   | 43.8%         |
| 6  | 93,079  | 1.63%         | 945   | 34.4%         |
| 7  | 74,745  | 1.67%         | 737   | 39.5%         |
| 8  | 54,884  | 2.02%         | 552   | 33.7%         |
| 9  | 71,993  | 2.00%         | 700   | 36.4%         |
| 10 | 72,337  | 2.09%         | 661   | 42.8%         |
| 11 | 100,348 | 1.37%         | 1,099 | 28.1%         |
| 12 | 90,393  | 1.84%         | 893   | 39.2%         |
| 13 | 33,338  | 2.10%         | 285   | 44.2%         |
| 14 | 57,376  | 2.03%         | 530   | 42.3%         |
| 15 | 57,376  | 1.60%         | 471   | 41.2%         |
| 16 | 72,087  | 1.53%         | 699   | 32.2%         |
| 17 | 99,335  | 1.48%         | 977   | 36.1%         |
| 18 | 26,318  | 2.28%         | 231   | 46.3%         |
| 19 | 105,059 | 0.73%         | 1,162 | 20.3%         |
| 20 | 46,254  | 1.78%         | 496   | 35.7%         |
| 21 | 18,367  | 1.76%         | 201   | 26.4%         |
| 22 | 35,151  | 1.35%         | 385   | 29.4%         |
| X  | 69,853  | 1.54%         | 724   | 28.9%         |

**Supplementary Table 1. Percentage of windows/genes on each chromosome in which our method identified significant synonymous constraint.**

## S6. Sequence composition and codon usage in SCEs

Since a major design goal for this study was to control for the specific codon sequence in each window, we carefully examined the sequence composition of the regions reported as significant. They do show certain subtle biases in sequence composition compared to other CCDS protein-coding sequences. For example, they have 3.4% lower G+C content at first and third codon positions (but 1.6% higher at second). CpG dinucleotides span 3.2% of second and third codon positions, compared to 2.4% in other coding regions, but they are slightly depleted spanning codon positions (1,2) and (3,1). Encoded serine residues are more frequent (9.2% of sites, compared to 8.2%) and tryptophan is less frequent (1.0% vs. 1.2%). These and numerous other nucleotide, dinucleotide and amino acid biases are statistically significant (Supplementary Table 2, below), but none represent more than a 1.4-fold enrichment or depletion, and most far less. To put this in perspective, human ORFs show comparable or greater compositional variation from chromosome to chromosome: for example, ORFs on chromosome 3 are 1.4-fold enriched for ApA dinucleotides across codon positions (3,1), and chromosome 19 ORFs are twofold depleted for TpA's spanning codon positions (2,3).

Other compositional properties of the SCEs allowed us to rule out certain possible artifactual explanations for their low divergence across mammals, at least as predominant effects. First, short tandem and microsatellite repeats within coding regions, which can be maintained through evolution by non-selective processes (Richard *et al.* 2008), might resemble codons with conserved synonymous sites, but the SCEs are depleted for such repeats relative to CCDS coding regions (0.87% vs. 2.03% of positions identified by TRF or the appropriate subset of RepeatMasker annotations). Second, biases in DNA mismatch repair can lead to a reduced apparent neutral substitution rate within some genomic isochores (Chamary *et al.* 2006), but the lower G+C content at third codon positions in SCEs is contrary to the trend in regions that have experienced such biased conversions (Galtier and Duret 2007). Third, codon usage biases related to translational efficiency or background compositional effects can reduce synonymous divergence without additional overlapping function, and while the relative usage frequencies of synonymous codons tend to differ between SCEs and other coding regions (Supplementary Table 3), the overall codon usage in SCEs is actually slightly less biased than average: the Effective Number of Codons (ENC, Wright 1990, Fuglsang 2006) in all SCEs taken together is 56.8, higher than in non-significant regions (54.4). Similarly, the ENC in a typical ORF containing an SCE (median 51.2) is slightly higher than in other ORFs (median 50.1). In contrast, the ENC is markedly reduced in ORFs with strong codon bias owing to isochore-specific G+C composition (Chamary *et al.* 2006).

In summary, the SCEs show significant but not extreme differences in sequence composition and codon usage compared to other coding regions, which probably reflect the sequence-dependent biological nature of the overlapping functional elements they encode. They may also partly reflect biases in our phylogenetic models arising from contextual effects they do not accurately capture, but the observed compositional biases do not suggest crippling shortcomings of our overall approach. In particular, the lack of

increased codon usage bias in SCEs indicates that, as intended, our method excluded regions explained by this effect.

**Supplementary Table 2 (follows on next page).** Nucleotide and dinucleotide sequence composition biases in SCEs (15-codon resolution). Columns:

- **rf** codon reading frame (0, 1, or 2)
- **kmer** the nucleotide or dinucleotide in question
- **exp** the average (expected) frequency of the nucleotide at the specified codon position in random subsets of CCDS sequences
- **sd** standard deviation of exp across multiple random subsets of CCDS sequences (each with comparable coverage to the real SCEs)
- **obs** frequency observed in SCEs
- **enrich**  $\log_2$  fold-enrichment/depletion relative to the random regions
- **Z** Z-score of enrichment/depletion relative to the random regions  $([obs - exp]/sd)$

| rf | kmer | exp    | sd    | obs    | enrich  | Z      |
|----|------|--------|-------|--------|---------|--------|
| 0  | A    | 26.76% | 0.07% | 28.46% | 0.0888  | 23.50  |
| 1  | A    | 31.54% | 0.09% | 30.50% | -0.0482 | -11.89 |
| 2  | A    | 19.44% | 0.06% | 22.01% | 0.1791  | 39.65  |
| 0  | C    | 24.72% | 0.09% | 23.89% | -0.0489 | -9.27  |
| 1  | C    | 23.15% | 0.08% | 25.47% | 0.1377  | 28.52  |
| 2  | C    | 29.62% | 0.09% | 27.10% | -0.1284 | -28.31 |
| 0  | G    | 31.40% | 0.10% | 29.78% | -0.0767 | -17.02 |
| 1  | G    | 18.83% | 0.07% | 19.16% | 0.0254  | 4.77   |
| 2  | G    | 28.34% | 0.08% | 25.57% | -0.1485 | -33.03 |
| 0  | T    | 17.12% | 0.06% | 17.87% | 0.0619  | 11.84  |
| 1  | T    | 26.48% | 0.08% | 24.87% | -0.0908 | -20.16 |
| 2  | T    | 22.60% | 0.07% | 25.33% | 0.1642  | 37.07  |
| 0  | AA   | 9.45%  | 0.05% | 10.17% | 0.1059  | 13.17  |
| 1  | AA   | 6.90%  | 0.04% | 7.49%  | 0.1200  | 13.56  |
| 2  | AA   | 5.20%  | 0.04% | 6.57%  | 0.3365  | 34.84  |
| 0  | AC   | 5.27%  | 0.04% | 5.58%  | 0.0827  | 8.48   |
| 1  | AC   | 7.50%  | 0.05% | 7.16%  | -0.0665 | -7.46  |
| 2  | AC   | 3.89%  | 0.03% | 4.23%  | 0.1219  | 11.25  |
| 0  | AG   | 5.54%  | 0.04% | 6.37%  | 0.1997  | 20.37  |
| 1  | AG   | 10.74% | 0.06% | 8.90%  | -0.2717 | -33.03 |
| 2  | AG   | 7.52%  | 0.04% | 8.08%  | 0.1030  | 13.34  |
| 0  | AT   | 6.50%  | 0.04% | 6.34%  | -0.0349 | -3.90  |
| 1  | AT   | 6.40%  | 0.04% | 6.95%  | 0.1182  | 12.92  |
| 2  | AT   | 2.83%  | 0.03% | 3.13%  | 0.1471  | 10.81  |
| 0  | CA   | 7.40%  | 0.04% | 7.00%  | -0.0792 | -9.30  |
| 1  | CA   | 6.06%  | 0.04% | 6.70%  | 0.1465  | 15.53  |
| 2  | CA   | 10.21% | 0.05% | 10.11% | -0.0142 | -1.94  |
| 0  | CC   | 6.05%  | 0.05% | 7.18%  | 0.2478  | 24.88  |
| 1  | CC   | 8.28%  | 0.05% | 7.93%  | -0.0620 | -7.33  |
| 2  | CC   | 8.47%  | 0.05% | 7.41%  | -0.1924 | -20.12 |
| 0  | CG   | 3.27%  | 0.03% | 2.96%  | -0.1452 | -8.96  |
| 1  | CG   | 2.37%  | 0.03% | 3.36%  | 0.5074  | 33.92  |
| 2  | CG   | 4.25%  | 0.04% | 3.48%  | -0.2890 | -21.83 |
| 0  | CT   | 8.00%  | 0.05% | 6.75%  | -0.2451 | -27.10 |
| 1  | CT   | 6.45%  | 0.04% | 7.47%  | 0.2122  | 25.22  |
| 2  | CT   | 6.69%  | 0.04% | 6.09%  | -0.1337 | -14.57 |
| 0  | GA   | 11.92% | 0.07% | 10.67% | -0.1606 | -18.85 |
| 1  | GA   | 3.46%  | 0.03% | 4.14%  | 0.2575  | 22.88  |
| 2  | GA   | 7.34%  | 0.04% | 6.78%  | -0.1144 | -12.48 |
| 0  | GC   | 6.90%  | 0.05% | 6.80%  | -0.0220 | -1.95  |
| 1  | GC   | 6.42%  | 0.05% | 5.81%  | -0.1439 | -12.35 |
| 2  | GC   | 7.37%  | 0.05% | 6.64%  | -0.1506 | -15.51 |
| 0  | GG   | 6.49%  | 0.04% | 6.92%  | 0.0937  | 11.32  |
| 1  | GG   | 5.10%  | 0.04% | 4.85%  | -0.0716 | -5.86  |
| 2  | GG   | 9.81%  | 0.05% | 8.49%  | -0.2084 | -24.17 |
| 0  | GT   | 6.09%  | 0.04% | 5.39%  | -0.1761 | -16.03 |
| 1  | GT   | 3.85%  | 0.03% | 4.36%  | 0.1805  | 16.12  |
| 2  | GT   | 3.82%  | 0.03% | 3.66%  | -0.0628 | -5.81  |
| 0  | TA   | 2.77%  | 0.03% | 2.66%  | -0.0559 | -4.08  |
| 1  | TA   | 3.02%  | 0.03% | 3.67%  | 0.2796  | 22.59  |
| 2  | TA   | 4.01%  | 0.03% | 5.01%  | 0.3184  | 30.86  |
| 0  | TC   | 4.93%  | 0.04% | 5.91%  | 0.2608  | 27.27  |
| 1  | TC   | 7.42%  | 0.05% | 6.20%  | -0.2605 | -23.11 |
| 2  | TC   | 4.99%  | 0.04% | 5.61%  | 0.1692  | 15.74  |
| 0  | TG   | 3.53%  | 0.03% | 2.92%  | -0.2740 | -19.19 |
| 1  | TG   | 10.14% | 0.04% | 8.46%  | -0.2612 | -38.88 |
| 2  | TG   | 9.82%  | 0.06% | 9.73%  | -0.0133 | -1.58  |
| 0  | TT   | 5.89%  | 0.04% | 6.38%  | 0.1151  | 10.94  |
| 1  | TT   | 5.90%  | 0.04% | 6.54%  | 0.1490  | 17.22  |
| 2  | TT   | 3.78%  | 0.04% | 4.99%  | 0.3980  | 34.22  |

**Supplementary Table 3 (follows on next page).** Codon usage biases in SCEs (15-codon resolution). Columns:

- **AA.codon** amino acid (IUPAC letter) and codon
- **exp** average (expected) frequency of the codon in random subsets of CCDS sequences, as a fraction of all sites encoding the corresponding amino acid
- **sd** standard deviation of exp across multiple random subsets of CCDS sequences (comparable coverage to the real SCEs)
- **obs** frequency observed in SCEs
- **enrich**  $\log_2$  fold-enrichment/depletion relative to the random regions
- **Z** Z-score of enrichment/depletion relative to the random regions  $([\text{inc obs} - \text{exp}]/\text{sd})$
- **degen** degeneracy, number of synonymous codons for this amino acid

| AA.codon exp | sd      | obs     | enrich  | Z     | degen  |   |
|--------------|---------|---------|---------|-------|--------|---|
| A.GCA        | 23.32%  | 0.2479% | 23.50%  | 0.01  | 0.75   | 4 |
| A.GCC        | 40.12%  | 0.3020% | 34.39%  | -0.22 | -18.96 | 4 |
| A.GCG        | 9.89%   | 0.1871% | 14.12%  | 0.51  | 22.58  | 4 |
| A.GCT        | 26.68%  | 0.2844% | 27.99%  | 0.07  | 4.63   | 4 |
| C.TGC        | 53.29%  | 0.5960% | 50.90%  | -0.07 | -4.01  | 2 |
| C.TGT        | 46.71%  | 0.5960% | 49.10%  | 0.07  | 4.01   | 2 |
| D.GAC        | 52.86%  | 0.4267% | 50.24%  | -0.07 | -6.14  | 2 |
| D.GAT        | 47.14%  | 0.4267% | 49.76%  | 0.08  | 6.14   | 2 |
| E.GAA        | 43.37%  | 0.3318% | 49.95%  | 0.20  | 19.82  | 2 |
| E.GAG        | 56.63%  | 0.3318% | 50.05%  | -0.18 | -19.82 | 2 |
| F.TTC        | 53.13%  | 0.4211% | 46.37%  | -0.20 | -16.07 | 2 |
| F.TTT        | 46.87%  | 0.4211% | 53.63%  | 0.19  | 16.07  | 2 |
| G.GGA        | 25.38%  | 0.3470% | 28.72%  | 0.18  | 9.63   | 4 |
| G.GGC        | 33.82%  | 0.3304% | 27.29%  | -0.31 | -19.79 | 4 |
| G.GGG        | 24.48%  | 0.3060% | 24.12%  | -0.02 | -1.18  | 4 |
| G.GGT        | 16.32%  | 0.2635% | 19.87%  | 0.28  | 13.49  | 4 |
| H.CAC        | 57.59%  | 0.4544% | 53.21%  | -0.11 | -9.63  | 2 |
| H.CAT        | 42.41%  | 0.4544% | 46.79%  | 0.14  | 9.63   | 2 |
| I.ATA        | 17.07%  | 0.2947% | 20.57%  | 0.27  | 11.88  | 3 |
| I.ATC        | 46.14%  | 0.4364% | 37.55%  | -0.30 | -19.67 | 3 |
| I.ATT        | 36.80%  | 0.3844% | 41.88%  | 0.19  | 13.23  | 3 |
| K.AAA        | 44.09%  | 0.3051% | 51.58%  | 0.23  | 24.56  | 2 |
| K.AAG        | 55.91%  | 0.3051% | 48.42%  | -0.21 | -24.56 | 2 |
| L.CTA        | 7.16%   | 0.1559% | 8.64%   | 0.27  | 9.49   | 6 |
| L.CTC        | 19.02%  | 0.2011% | 16.95%  | -0.17 | -10.27 | 6 |
| L.CTG        | 39.47%  | 0.2531% | 31.52%  | -0.32 | -31.41 | 6 |
| L.CTT        | 13.40%  | 0.1638% | 15.05%  | 0.17  | 10.08  | 6 |
| L.TTA        | 7.96%   | 0.1122% | 11.51%  | 0.53  | 31.60  | 6 |
| L.TTG        | 13.00%  | 0.1771% | 16.34%  | 0.33  | 18.85  | 6 |
| M.ATG        | 100.00% | 0.0000% | 100.00% | 0.00  | N/A    | 1 |
| N.AAC        | 52.05%  | 0.4332% | 49.17%  | -0.08 | -6.64  | 2 |
| N.AAT        | 47.95%  | 0.4332% | 50.83%  | 0.08  | 6.64   | 2 |
| P.CCA        | 27.99%  | 0.2903% | 28.19%  | 0.01  | 0.72   | 4 |
| P.CCC        | 32.25%  | 0.3025% | 27.51%  | -0.23 | -15.66 | 4 |
| P.CCG        | 10.87%  | 0.2156% | 14.03%  | 0.37  | 14.65  | 4 |
| P.CCT        | 28.89%  | 0.2906% | 30.27%  | 0.07  | 4.72   | 4 |
| Q.CAA        | 26.61%  | 0.3306% | 32.42%  | 0.28  | 17.58  | 2 |
| Q.CAG        | 73.39%  | 0.3306% | 67.58%  | -0.12 | -17.58 | 2 |
| R.AGA        | 21.24%  | 0.2545% | 25.86%  | 0.28  | 18.18  | 6 |
| R.AGG        | 20.41%  | 0.2821% | 22.26%  | 0.13  | 6.57   | 6 |
| R.CGA        | 11.21%  | 0.2428% | 11.90%  | 0.09  | 2.84   | 6 |
| R.CGC        | 18.58%  | 0.3395% | 15.48%  | -0.26 | -9.12  | 6 |
| R.CGG        | 20.54%  | 0.2967% | 16.66%  | -0.30 | -13.09 | 6 |
| R.CGT        | 8.03%   | 0.1475% | 7.83%   | -0.04 | -1.32  | 6 |
| S.AGC        | 23.94%  | 0.2384% | 21.42%  | -0.16 | -10.58 | 6 |
| S.AGT        | 15.48%  | 0.2304% | 16.58%  | 0.10  | 4.80   | 6 |
| S.TCA        | 15.23%  | 0.2230% | 15.64%  | 0.04  | 1.83   | 6 |
| S.TCC        | 21.27%  | 0.2543% | 19.69%  | -0.11 | -6.22  | 6 |
| S.TCG        | 5.33%   | 0.1396% | 6.88%   | 0.37  | 11.15  | 6 |
| S.TCT        | 18.76%  | 0.2234% | 19.79%  | 0.08  | 4.63   | 6 |
| T.ACA        | 28.74%  | 0.3174% | 28.51%  | -0.01 | -0.74  | 4 |
| T.ACC        | 34.74%  | 0.3226% | 31.24%  | -0.15 | -10.85 | 4 |
| T.ACG        | 11.22%  | 0.2457% | 13.23%  | 0.24  | 8.21   | 4 |
| T.ACT        | 25.31%  | 0.2887% | 27.02%  | 0.09  | 5.96   | 4 |
| V.GTA        | 11.94%  | 0.2130% | 16.19%  | 0.44  | 19.92  | 4 |
| V.GTC        | 23.31%  | 0.2890% | 22.05%  | -0.08 | -4.35  | 4 |
| V.GTG        | 46.27%  | 0.3526% | 38.58%  | -0.26 | -21.80 | 4 |
| V.GTT        | 18.48%  | 0.2786% | 23.18%  | 0.33  | 16.88  | 4 |
| W.TGG        | 100.00% | 0.0000% | 100.00% | 0.00  | N/A    | 1 |
| Y.TAC        | 54.82%  | 0.4607% | 51.83%  | -0.08 | -6.49  | 2 |
| Y.TAT        | 45.18%  | 0.4607% | 48.17%  | 0.09  | 6.49   | 2 |

## S7. Characteristics of genes containing SCEs

**Gene length.** In the main text, we note that the ORFs containing SCEs tend to be longer than other CCDS ORFs, but not significantly longer or shorter than expected based on randomly sampling ORFs weighted by their length. The consistency of the observed ORF length distribution with the random distribution could be taken to suggest a problem with the SCE dataset. In particular, if our method just randomly called one false positive out of every  $n$  windows tested, we would also expect to see the random ORF length distribution.

However, in addition to our rigorous multiple testing corrections further supported by simulation and permutation benchmarks (Supplement S3, above), we collected a few other statistics that strongly argue against random false positives as a predominant explanation:

- SCEs are depleted in the lengthiest quartile of single-exon ORFs relative to comparable multi-exon ORFs (0.76 vs. 1.21 SCEs per 1,000 codons). Such a depletion would not be expected from random false positives. Instead, this seems to reflect the fact that longer genes also tend to have more exons, and therefore potentially more splice sites regulated by exonic regulatory sequences.
- A linear model predicting the number of SCEs in each gene based on its length and number of introns shows that both variables are significant, but even combined they only provide limited explanatory power ( $R^2 = 0.20$ ). We would expect much higher correlation from random false positives occurring at a fixed rate.
- The individual *introns* in genes containing SCEs also tend to be much longer, which clearly cannot be directly explained by a multiple testing issue, since our method does not examine intronic sequences.

In general, gene length (both ORF length, and genomic span including introns) is known to correlate with numerous other relevant characteristics including expression levels, functional categories, conservation, etc., and ultimately it can be difficult to disentangle these effects (Castillo-Davis *et al.* 2002, Urrutia and Hurst 2003, Stanley *et al.* 2006, Pozzoli *et al.* 2007). Overall therefore, while we are highly confident that the observed ORF length distribution does not reflect an artifactual multiple testing issue, the available evidence does not support making more-specific claims about the association between SCEs and gene length.

**Supplementary Table 4 (follows on next page). Gene Ontology enrichments for SCEs (15-codon resolution).** The enrichments are assessed in the hypergeometric sampling paradigm of drawing from an urn containing white and black balls, where the white balls are of interest, representing the genes annotated with a given GO term. The balls are either genes (left-hand group of columns) or individual windows (right-hand group), where in the latter case the GO terms associated with each gene are propagated to all windows in its ORF. Columns:

- **w** number of white balls drawn from the urn (number of genes/windows with the corresponding term containing an SCE)
- **W** total number of white balls in the urn before drawing (total number of genes/windows with the corresponding term)
- **B** total number of black balls in the urn before drawing (total number of genes – W)
- **w+b** number of balls drawn from the urn
- **prop w** proportion of drawn balls that are white ( $w/[w+b]$ )
- **prop W**, proportion of all white balls that were drawn ( $w/W$ )
- **enrich** fold enrichment of white balls in the drawn set compared to originally in the urn ( $\text{prop } w / [W/(W+B)]$ )
- **bonfP** Bonferroni-corrected *P*-value of enrichment computed from the hypergeometric distribution.

The purpose of the window-level analysis (right-hand group of columns) is to control for the varying ORF lengths, which can otherwise be a major confounding factor when certain GO terms are enriched in longer or shorter genes. It is somewhat incorrect to use the hypergeometric distribution in the window-level analysis because of the overlapping sliding windows (balls are not drawn independently), but the numbers involved are sufficiently large that this is unlikely to be a serious problem (i.e. the hypergeometric has essentially converged to a binomial in this regime, and e.g. dividing all the counts by three, or performing the analysis only on non-overlapping windows, still leads to highly significant *P*-values).

| GO term    | description                                                 | balls = genes |      |       |      |        |        | balls = windows |          |      |       |         |       |        |        |        |           |
|------------|-------------------------------------------------------------|---------------|------|-------|------|--------|--------|-----------------|----------|------|-------|---------|-------|--------|--------|--------|-----------|
|            |                                                             | w             | W    | B     | w+b  | prop w | prop W | enrich          | bonfP    | w    | W     | B       | w+b   | prop w | prop W | enrich | bonfP     |
| GO:0016568 | chromatin modification                                      | 94            | 134  | 16777 | 6033 | 1.56%  | 70.15% | 1.97            | 7.87E-13 | 949  | 25223 | 1701979 | 29731 | 3.19%  | 3.76%  | 2.19   | 8.12E-102 |
| GO:0005249 | voltage-gated potassium channel activity                    | 65            | 97   | 16814 | 6033 | 1.08%  | 67.01% | 1.88            | 7.14E-07 | 330  | 10184 | 1717018 | 29731 | 1.11%  | 3.24%  | 1.88   | 1.37E-22  |
| GO:0022843 | voltage-gated cation channel activity                       | 78            | 117  | 16794 | 6033 | 1.29%  | 66.67% | 1.87            | 1.87E-08 | 392  | 12702 | 1714500 | 29731 | 1.32%  | 3.09%  | 1.79   | 2.95E-23  |
| GO:0034703 | cation channel complex                                      | 65            | 98   | 16813 | 6033 | 1.08%  | 66.33% | 1.86            | 1.43E-06 | 357  | 10301 | 1716901 | 29731 | 1.20%  | 3.47%  | 2.01   | 6.84E-30  |
| GO:0004842 | ubiquitin-protein ligase activity                           | 66            | 101  | 16810 | 6033 | 1.09%  | 65.35% | 1.83            | 2.85E-06 | 468  | 15026 | 1712176 | 29731 | 1.57%  | 3.11%  | 1.81   | 4.93E-29  |
| GO:0005267 | potassium channel activity                                  | 77            | 121  | 16790 | 6033 | 1.28%  | 63.64% | 1.78            | 8.65E-07 | 381  | 11963 | 1715239 | 29731 | 1.28%  | 3.18%  | 1.85   | 5.31E-25  |
| GO:0006813 | potassium ion transport                                     | 91            | 143  | 16768 | 6033 | 1.51%  | 63.64% | 1.78            | 2.19E-08 | 414  | 15029 | 1712173 | 29731 | 1.39%  | 2.75%  | 1.60   | 6.31E-16  |
| GO:0019787 | small conjugating protein ligase activity                   | 74            | 117  | 16794 | 6033 | 1.23%  | 63.25% | 1.77            | 2.91E-06 | 505  | 16122 | 1711080 | 29731 | 1.70%  | 3.13%  | 1.82   | 4.42E-32  |
| GO:0030955 | potassium ion binding                                       | 68            | 110  | 16801 | 6033 | 1.13%  | 61.82% | 1.73            | 5.64E-05 | 272  | 11771 | 1715431 | 29731 | 0.91%  | 2.31%  | 1.34   | 9.41E-03  |
| GO:0034702 | ion channel complex                                         | 68            | 110  | 16801 | 6033 | 1.13%  | 61.82% | 1.73            | 5.64E-05 | 363  | 11432 | 1715770 | 29731 | 1.22%  | 3.18%  | 1.84   | 1.69E-23  |
| GO:0005244 | voltage-gated ion channel activity                          | 98            | 159  | 16752 | 6033 | 1.62%  | 61.64% | 1.73            | 5.92E-08 | 453  | 16764 | 1710438 | 29731 | 1.52%  | 2.70%  | 1.57   | 3.67E-16  |
| GO:0022832 | voltage-gated channel activity                              | 98            | 159  | 16752 | 6033 | 1.62%  | 61.64% | 1.73            | 5.92E-08 | 453  | 16764 | 1710438 | 29731 | 1.52%  | 2.70%  | 1.57   | 3.67E-16  |
| GO:0045892 | negative regulation of transcription, DNA-dependent         | 89            | 148  | 16763 | 6033 | 1.48%  | 60.14% | 1.69            | 3.20E-06 | 540  | 15124 | 1712078 | 29731 | 1.82%  | 3.57%  | 2.07   | 5.45E-50  |
| GO:0051253 | negative regulation of RNA metabolic process                | 90            | 150  | 16761 | 6033 | 1.49%  | 60.00% | 1.68            | 3.06E-06 | 553  | 15310 | 1711892 | 29731 | 1.86%  | 3.61%  | 2.10   | 9.36E-53  |
| GO:0016564 | transcription repressor activity                            | 89            | 149  | 16762 | 6033 | 1.48%  | 59.73% | 1.67            | 5.27E-06 | 629  | 16040 | 1711162 | 29731 | 2.12%  | 3.92%  | 2.28   | 4.91E-73  |
| GO:0016881 | acid-amino acid ligase activity                             | 78            | 131  | 16780 | 6033 | 1.29%  | 59.54% | 1.67            | 6.42E-05 | 591  | 17796 | 1709406 | 29731 | 1.75%  | 2.92%  | 1.69   | 8.67E-26  |
| GO:0016029 | negative regulation of gene expression                      | 129           | 222  | 16689 | 6033 | 1.84%  | 58.11% | 1.63            | 2.09E-08 | 819  | 25014 | 1702188 | 29731 | 3.00%  | 3.56%  | 2.07   | 1.20E-83  |
| GO:0016481 | negative regulation of transcription                        | 122           | 210  | 16701 | 6033 | 2.02%  | 58.10% | 1.63            | 7.94E-08 | 828  | 23515 | 1703687 | 29731 | 2.78%  | 3.52%  | 2.05   | 2.74E-75  |
| GO:0022836 | gated channel activity                                      | 140           | 242  | 16669 | 6033 | 2.32%  | 57.85% | 1.62            | 4.28E-09 | 768  | 28566 | 1698636 | 29731 | 2.58%  | 2.69%  | 1.56   | 2.65E-28  |
| GO:0016879 | ligase activity, forming carbon-nitrogen bonds              | 87            | 151  | 16760 | 6033 | 1.44%  | 57.62% | 1.62            | 9.69E-05 | 541  | 20471 | 1706731 | 29731 | 1.82%  | 2.64%  | 1.54   | 9.10E-18  |
| GO:0007399 | nervous system development                                  | 146           | 256  | 16655 | 6033 | 2.42%  | 57.03% | 1.60            | 6.76E-09 | 811  | 28878 | 1698324 | 29731 | 2.73%  | 2.81%  | 1.63   | 4.81E-36  |
| GO:0016071 | mRNA metabolic process                                      | 135           | 239  | 16672 | 6033 | 2.24%  | 56.49% | 1.58            | 1.18E-07 | 830  | 23952 | 1703250 | 29731 | 2.79%  | 3.47%  | 2.01   | 2.03E-72  |
| GO:0006512 | ubiquitin cycle                                             | 202           | 358  | 16553 | 6033 | 3.35%  | 56.42% | 1.58            | 1.86E-12 | 1013 | 42940 | 1684262 | 29731 | 3.41%  | 2.36%  | 1.37   | 5.74E-19  |
| GO:0003713 | transcription coactivator activity                          | 80            | 142  | 16769 | 6033 | 1.33%  | 56.34% | 1.58            | 1.32E-03 | 550  | 17356 | 1709846 | 29731 | 1.85%  | 3.17%  | 1.84   | 1.91E-36  |
| GO:0005261 | cation channel activity                                     | 114           | 204  | 16707 | 6033 | 1.93%  | 55.88% | 1.57            | 9.45E-06 | 585  | 24428 | 1702774 | 29731 | 1.97%  | 2.39%  | 1.39   | 4.44E-11  |
| GO:0043565 | sequence-specific DNA binding                               | 228           | 408  | 16503 | 6033 | 3.78%  | 55.88% | 1.57            | 1.13E-13 | 1224 | 33856 | 1693346 | 29731 | 4.12%  | 3.62%  | 2.10   | 1.26E-120 |
| GO:0003702 | RNA polymerase II transcription factor activity             | 101           | 182  | 16729 | 6033 | 1.67%  | 55.49% | 1.56            | 1.23E-04 | 744  | 19988 | 1707214 | 29731 | 2.50%  | 3.72%  | 2.16   | 3.37E-77  |
| GO:0004674 | protein serine/threonine kinase activity                    | 180           | 325  | 16586 | 6033 | 2.98%  | 55.38% | 1.55            | 7.77E-10 | 942  | 44306 | 1682896 | 29731 | 3.17%  | 2.13%  | 1.24   | 5.40E-07  |
| GO:0003700 | transcription factor activity                               | 399           | 722  | 16189 | 6033 | 6.61%  | 55.26% | 1.55            | 1.69E-24 | 2204 | 69219 | 1657983 | 29731 | 7.41%  | 3.18%  | 1.85   | 3.83E-159 |
| GO:0046873 | metal ion transmembrane transporter activity                | 132           | 239  | 16672 | 6033 | 2.19%  | 55.23% | 1.55            | 1.59E-06 | 657  | 28801 | 1698401 | 29731 | 2.21%  | 2.28%  | 1.33   | 7.52E-09  |
| GO:0016563 | transcription activator activity                            | 127           | 230  | 16681 | 6033 | 2.11%  | 55.22% | 1.55            | 3.45E-06 | 865  | 26907 | 1700295 | 29731 | 2.91%  | 3.21%  | 1.87   | 2.57E-61  |
| GO:0048731 | system development                                          | 229           | 415  | 16496 | 6033 | 3.80%  | 55.18% | 1.55            | 7.16E-13 | 1218 | 46666 | 1680536 | 29731 | 4.10%  | 2.61%  | 1.52   | 1.11E-40  |
| GO:0003712 | transcription cofactor activity                             | 124           | 226  | 16685 | 6033 | 2.06%  | 54.87% | 1.54            | 9.33E-06 | 853  | 26168 | 1701034 | 29731 | 2.87%  | 3.26%  | 1.89   | 6.04E-63  |
| GO:0008134 | transcription factor binding                                | 162           | 296  | 16615 | 6033 | 2.69%  | 54.73% | 1.53            | 4.60E-08 | 1142 | 35308 | 1691894 | 29731 | 3.84%  | 3.23%  | 1.88   | 1.82E-83  |
| GO:0045934 | negative regulation of nucleobase, nucleoside, nucleotide   | 128           | 234  | 16677 | 6033 | 2.12%  | 54.70% | 1.53            | 6.75E-06 | 853  | 26127 | 1701075 | 29731 | 2.87%  | 3.26%  | 1.90   | 3.12E-63  |
| GO:0006397 | mRNA processing                                             | 114           | 209  | 16702 | 6033 | 1.89%  | 54.55% | 1.53            | 6.37E-05 | 698  | 20017 | 1707185 | 29731 | 2.35%  | 3.49%  | 2.03   | 1.79E-61  |
| GO:0008380 | RNA splicing                                                | 96            | 176  | 16735 | 6033 | 1.59%  | 54.55% | 1.53            | 8.36E-04 | 596  | 16636 | 1710566 | 29731 | 2.00%  | 3.58%  | 2.08   | 6.98E-56  |
| GO:0051172 | negative regulation of nitrogen compound metabolic process  | 128           | 235  | 16676 | 6033 | 2.12%  | 54.47% | 1.53            | 9.73E-06 | 853  | 26201 | 1701001 | 29731 | 2.87%  | 3.26%  | 1.89   | 1.03E-62  |
| GO:0006325 | chromatin organization                                      | 135           | 248  | 16663 | 6033 | 2.24%  | 54.44% | 1.53            | 3.80E-06 | 1118 | 31560 | 1695642 | 29731 | 3.76%  | 3.54%  | 2.06   | 2.04E-104 |
| GO:0006357 | regulation of transcription from RNA polymerase II promoter | 179           | 329  | 16582 | 6033 | 2.97%  | 54.41% | 1.53            | 7.82E-09 | 991  | 34259 | 1692943 | 29731 | 3.33%  | 2.89%  | 1.68   | 6.18E-50  |
| GO:0004672 | protein kinase activity                                     | 262           | 482  | 16429 | 6033 | 4.34%  | 54.36% | 1.52            | 6.48E-14 | 1422 | 70231 | 1656971 | 29731 | 4.78%  | 2.02%  | 1.18   | 2.98E-06  |
| GO:0016773 | phosphotransferase activity, alcohol group as acceptor      | 306           | 573  | 16338 | 6033 | 5.07%  | 53.40% | 1.50            | 3.83E-15 | 1616 | 82576 | 1644626 | 29731 | 5.44%  | 1.96%  | 1.14   | 6.71E-04  |
| GO:0016310 | phosphorylation                                             | 286           | 540  | 16371 | 6033 | 4.74%  | 52.96% | 1.48            | 2.40E-13 | 1557 | 74870 | 1652332 | 29731 | 5.24%  | 2.08%  | 1.21   | 2.90E-10  |
| GO:0006468 | protein amino acid phosphorylation                          | 267           | 506  | 16405 | 6033 | 4.43%  | 52.77% | 1.48            | 4.93E-12 | 1490 | 70338 | 1656864 | 29731 | 5.01%  | 2.12%  | 1.23   | 4.92E-12  |
| GO:0044451 | nucleoplasm part                                            | 144           | 273  | 16638 | 6033 | 2.39%  | 52.75% | 1.48            | 1.95E-05 | 833  | 32028 | 1695174 | 29731 | 2.80%  | 2.60%  | 1.51   | 1.66E-26  |
| GO:0005216 | ion channel activity                                        | 154           | 292  | 16619 | 6033 | 2.55%  | 52.74% | 1.48            | 5.82E-06 | 828  | 34875 | 1692327 | 29731 | 2.78%  | 2.37%  | 1.38   | 1.02E-15  |
| GO:0030528 | transcription regulator activity                            | 561           | 1064 | 15847 | 6033 | 9.30%  | 52.73% | 1.48            | 2.60E-28 | 3275 | 1E+05 | 1618955 | 29731 | 11.02% | 3.03%  | 1.76   | 4.58E-208 |
| GO:0045941 | positive regulation of transcription                        | 117           | 222  | 16689 | 6033 | 1.94%  | 52.70% | 1.48            | 5.57E-04 | 765  | 24942 | 1702260 | 29731 | 2.57%  | 3.07%  | 1.78   | 1.57E-46  |
| GO:0045935 | positive regulation of nucleobase, nucleoside, nucleotide   | 122           | 232  | 16679 | 6033 | 2.02%  | 52.59% | 1.47            | 3.59E-04 | 784  | 25841 | 1701361 | 29731 | 2.64%  | 3.03%  | 1.76   | 4.62E-46  |
| GO:0015672 | monovalent inorganic cation transport                       | 135           | 257  | 16654 | 6033 | 2.24%  | 52.53% | 1.47            | 8.23E-05 | 808  | 27721 | 1699481 | 29731 | 2.05%  | 2.19%  | 1.27   | 1.80E-05  |
| GO:0031327 | negative regulation of cellular biosynthetic process        | 135           | 257  | 16654 | 6033 | 2.24%  | 52.53% | 1.47            | 8.23E-05 | 856  | 27637 | 1699565 | 29731 | 2.88%  | 3.10%  | 1.80   | 4.60E-54  |
| GO:0009890 | negative regulation of biosynthetic process                 | 135           | 258  | 16653 | 6033 | 2.24%  | 52.33% | 1.47            | 1.13E-04 | 856  | 27651 | 1699551 | 29731 | 2.88%  | 3.10%  | 1.80   | 5.63E-54  |
| GO:0015267 | channel activity                                            | 160           | 308  | 16603 | 6033 | 2.65%  | 51.95% | 1.46            | 1.21E-05 | 839  | 35775 | 1691427 | 29731 | 2.82%  | 2.35%  | 1.36   | 1.12E-14  |
| GO:0022803 | passive transmembrane transporter activity                  | 160           | 308  | 16603 | 6033 | 2.65%  | 51.95% | 1.46            | 1.21E-05 | 839  | 35775 | 1691427 | 29731 | 2.82%  | 2.35%  | 1.36   | 1.12E-14  |
| GO:0022838 | substrate specific channel activity                         | 155           | 299  | 16612 | 6033 | 2.57%  | 51.84% | 1.45            | 2.57E-05 | 830  | 35251 | 1691951 | 29731 | 2.79%  | 2.35%  | 1.37   | 6.69E-15  |
| GO:0010558 | negative regulation of macromolecule biosynthetic process   | 130           | 251  | 16660 | 6033 | 2.15%  | 51.79% | 1.45            | 4.52E-04 | 845  | 27032 | 1700170 | 29731 | 2.84%  | 3.13%  | 1.82   | 6.51E-55  |
| GO:0010628 | positive regulation of gene expression                      | 118           | 228  | 16683 | 6033 | 1.96%  | 51.75% | 1.45            | 1.81E-03 | 766  | 25309 | 1701893 | 29731 | 2.58%  | 3.03%  | 1.76   | 1.40E-44  |
| GO:0006793 | phosphorus metabolic process                                | 345           | 668  | 16243 | 6033 | 5.72%  | 51.65% | 1.45            | 2.36E-14 | 1829 | 89535 | 1637667 | 29731 | 6.15%  | 2.04%  | 1.19   | 5.56E-10  |
| GO:0006796 | phosphate metabolic process                                 | 345           | 668  | 16243 | 6033 | 5.72%  | 51.65% | 1.45            | 2.36E-14 | 1829 | 89535 | 1637667 | 29731 | 6.15%  | 2.04%  | 1.19   | 5.56E-10  |
| GO:0031324 | negative regulation of cellular metabolic process           | 159           | 308  | 16603 | 6033 | 2.64%  | 51.62% | 1.45            | 2.43E-05 | 989  | 34706 | 1692496 | 29731 | 3.33%  | 2.85%  | 1.66   | 4.03E-47  |
| GO:0010605 | negative regulation of macromolecule metabolic process      | 159           | 310  | 16601 | 6033 | 2.64%  | 51.29% | 1.44            | 4.41E-05 | 1035 | 35560 | 1691642 | 29731 | 3.48%  | 2.91%  | 1.69   | 1.80E-53  |
| GO:0051173 | positive regulation of nitrogen compound metabolic process  | 122           | 238  | 16673 | 6033 | 2.02%  | 51.26% | 1.44            | 2.30E-03 | 784  | 26388 | 1700814 | 29731 | 2.64%  | 2.97%  | 1.73   | 7.08E-43  |
| GO:0009892 | negative regulation of metabolic process                    | 166           | 324  | 16587 | 6033 | 2.75%  | 51.23% | 1.44            | 2.33E-05 | 1052 | 36379 | 1690823 | 29731 | 3.54%  | 2.89%  | 1.68   | 3.91E-53  |
| GO:0016301 | kinase activity                                             | 329           | 643  | 16268 | 6033 | 5.45%  | 51.17% | 1.43            | 8.44E-13 | 1743 | 87838 | 1639364 | 29731 | 5.86%  | 1.98%  | 1.15   | 7.01E-06  |
| GO:0051276 | chromosome organization                                     | 153           | 300  | 16611 | 6033 | 2.54%  | 51.00% | 1.43            | 1.36E-04 | 1182 | 40303 | 1686899 | 29731 | 3.98%  | 2.93%  | 1.70   | 3.24E-63  |
| GO:0043687 | post-translational protein modification                     | 408           | 801  | 16110 | 6033 | 6.76%  | 50.94% | 1.43            |          |      |       |         |       |        |        |        |           |

## S8. Enrichment of exonic splicing enhancer and miRNA target motifs in SCEs

We analyzed the enrichment of short sequence motifs corresponding to exonic splicing enhancers (ESEs) and miRNA target seeds by comparing their frequencies in the 9-codon SCEs compared to other coding regions.

The motifs of interest include:

- 238 hexamers identified as likely ESEs in Fairbrother *et al.* (2002)
- 1,062 7mers corresponding to the reverse complement of positions 2-8 and T+2-7 of all human miRNA mature sequences (Lewis *et al.* 2005) in miRBase v13.0 (Griffiths-Jones *et al.* 2008)

We estimated *P* values for observed enrichments by treating the instances of each motif within SCEs as a hypergeometric sample of all its instances within coding regions. To control for sequence composition effects, we additionally evaluated equal-sized sets of shuffled and reverse-complemented versions of the motifs of interest. To control for frame-specific compositional effects, we also evaluated motifs and controls in the reading frame with the fewest instances of each hexamer/7mer (Stark *et al.* 2007).

| Motifs           | SCEs                              | Total in all three frames |              |                         | Frame with fewest instances |               |                         |
|------------------|-----------------------------------|---------------------------|--------------|-------------------------|-----------------------------|---------------|-------------------------|
|                  |                                   | Freq in SCEs              | Freq in CCDS | Enrich. <i>P</i> -value | Freq* in SCEs               | Freq* in CCDS | Enrich. <i>P</i> -value |
| ESEs             | All                               | 10.47%                    | 10.59%       | 0.99                    | 9.84%                       | 8.91%         | <10 <sup>-17</sup>      |
| Rev. comp. ESEs  | "                                 | 7.38%                     | 6.79%        | <10 <sup>-51</sup>      | 8.23%                       | 7.76%         | <10 <sup>-5</sup>       |
| Shuffled ESEs    | "                                 | 8.27%                     | 7.99%        | <10 <sup>-11</sup>      | 8.19%                       | 7.68%         | <10 <sup>-6</sup>       |
| ESEs             | Spanning exon-exon junctions only | 11.62%                    | 10.59%       | <10 <sup>-26</sup>      | 12.01%                      | 8.91%         | <10 <sup>-38</sup>      |
| Rev. comp. ESEs  | "                                 | 7.74%                     | 6.79%        | <10 <sup>-31</sup>      | 8.98%                       | 7.76%         | <10 <sup>-7</sup>       |
| Shuffled ESEs    | "                                 | 9.15%                     | 7.99%        | <10 <sup>-40</sup>      | 9.92%                       | 7.68%         | <10 <sup>-24</sup>      |
| miRNA seeds      | All                               | 8.88%                     | 8.63%        | <10 <sup>-7</sup>       | 9.86%                       | 9.23%         | <10 <sup>-6</sup>       |
| Rev. comp. seeds | "                                 | 7.99%                     | 8.21%        | 1                       | 8.26%                       | 8.25%         | 0.45                    |
| Shuffled seeds   | "                                 | 6.81%                     | 6.68%        | <10 <sup>-3</sup>       | 7.05%                       | 6.86%         | 0.04                    |
| miRNA seeds      | Last coding exon only             | 9.32%                     | 8.63%        | <10 <sup>-5</sup>       | 12.40%                      | 9.23%         | <10 <sup>-5</sup>       |
| Rev. comp. seeds | "                                 | 7.99%                     | 8.21%        | 0.94                    | 8.99%                       | 8.25%         | 0.12                    |
| Shuffled seeds   | "                                 | 7.06%                     | 6.68%        | 0.003                   | 8.06%                       | 6.86%         | 0.02                    |

**Supplementary Table 5. Enrichment of short sequence motifs and controls in SCEs. \* as fraction of total instances of all hexamers/7mers in their respective reading frame with the fewest instances.**

The miRNA seeds consistently show stronger enrichments than the matched controls, indicating that their increased frequency is not explained by correlated sequence composition biases. The ESEs also show enrichment in SCEs spanning exon-exon junctions, but it is only stronger than the controls for the frame-invariant statistic, making it more difficult to unambiguously distinguish from correlated composition biases.

## S9. Preliminary assessment of novel dual-coding ORFs associated with SCEs

We searched for ORFs in alternative reading frames of known CCDS ORFs that (1) are longer than expected based on nucleotide, dinucleotide, *and* codon shuffles of the CCDS sequence; (2) are open (contain no in-frame stop codons) over at least 80% of the length in at least 15 of the 29 species; and (3) overlap 30-codon SCEs. We required ORFs in antisense reading frames to lie contiguously in the genome, since it is unlikely that exon structure would be preserved in both sense and antisense transcription units. Alternate reading frames on the sense strand were allowed to span multiple exons of the annotated transcripts.

The lengths were assessed by shuffling the sequence of each complete CCDS ORF at the nucleotide, dinucleotide, or codon levels, and then determining the longest ORF in any alternate frame of the shuffled sequence. Candidate dual-coding ORFs were discarded if they were not longer than the longest alternate ORF in 95% of shuffled sequences for all three shuffling methods.

Overall, this is a highly conservative strategy for this preliminary assessment (particularly due to the ORF length requirements), which did not detect the known dual-coding ORFs mentioned in the main text. We expect that this can be greatly refined in the future using specialized methods.

| Known gene | CCDS ID     | Orient. | Length (AA) | Putative alternate translation                                                                                                                                                                                                                                           | Comments                              |
|------------|-------------|---------|-------------|--------------------------------------------------------------------------------------------------------------------------------------------------------------------------------------------------------------------------------------------------------------------------|---------------------------------------|
| WAC        | CCDS7159.1  | Sense   | 188         | CMRGNSRDSVMAVTTGGGTRSLTRHLSIHRRVTPV<br>AVITDMKRCETPEILHHQIKCCGDLIVLKTNTVTA<br>QVTVRPKMCILTELRGMVGPVTLHKKIHTTTVLF<br>IVQIHILLIQAITQAKLQMHLMILQMTGLSILALL<br>GKSTTTTIVEQKFHNGKNQKSGLKENRDKKKQTRWQ<br>STASQKIGITEER                                                         | Predicted in AF116666                 |
| PHF7       | CCDS2854.1  | Sense   | 171         | GNFFRKTIISACIISVLSYLVSLRGASPTASMDF<br>CLKTSKRQPGLLGRSALCARKRELLSTARRISAS<br>ETSICLVAKKGVAFHNFLESTNHFTVNTIAQHRTSN<br>MGMWGRKAASYVVKTYPNRVLRTSRARVVVKPSTT<br>ASAYRNMPHQQSISSNVHVSVTIEKSFLKCC                                                                               | Predicted in AF151060                 |
| ZNF3       | CCDS43619.1 | Sense   | 240         | IPTLSHIRDSPWETDPISVMNVARALIELQTLFNI<br>RESTLGKSPMNVMSVGRPSARAHTLFSIRESTLGK<br>NLMNVVIVGKPSAVALPSFCIGGSTRGRNPMNVMS<br>VGRPSAGAPPSPPTIRESTLVRNPTAMNVGRPSAG<br>AQPLFTIRESTLEKNPMNMVNVGKPSARAHTSIST<br>RESTLERSPTNVWNVEESLPTVQALFSIKESTPGR<br>TPMNVVSVGKPSGTARLLFAIREFTLERSL | High similarity to various other ZNFs |
| FAM98A     | CCDS33179.1 | Sense   | 220         | WAGCLTEVVDPMKSNLHPQRCRGRRGKMAPSSKQ<br>EAEEEGEVAMNIPHTEDEEVNMKEAGEVDVVAMTM<br>VAEGEEEEISIKEAGQMEGVVEEVATKMVVIEIQV<br>SSQVAIMVATAVVAIKAEVMVASKHLLHIQEVDT<br>VVATSRTIDTKMAGTMVIVVVVVVEVVEAEVVV<br>QAREEAGEEEGARIITKGVNLNLISSMEVISIIL<br>DLRDREITLV                          |                                       |
| UBE2E2     | CCDS2637.1  | Sense   | 136         | CPLRHKELMTVQALVEEVPMEINVKVFSKNQKENK<br>FSRKRREKYPAPKLLNCQLVLKEFRRLQKSHWT<br>LLPTVVLDPKETTFMNGGQLYWDPQDLMSKEGCSF<br>LTLPFHQITIRLNPLRLPSEQESITVILTAKV                                                                                                                      |                                       |

|         |             |           |     |                                                                                                                                                                                                                                                                                                                                                                                                                                                                                     |                                            |
|---------|-------------|-----------|-----|-------------------------------------------------------------------------------------------------------------------------------------------------------------------------------------------------------------------------------------------------------------------------------------------------------------------------------------------------------------------------------------------------------------------------------------------------------------------------------------|--------------------------------------------|
| EYA1    | CCDS34906.1 | Sense     | 178 | TISQVQQLGAVVSAHDQLTSSSLHHRFTLPTDHTHI<br>FSLPLPHKLWLHMGKHSPLPQECNKLQPMPTHSQD<br>SRTAFPHMVHCGQASRLKVDCHSLSHLDRQDFSAM<br>AQASVPLNDRHHTATRCKVAVLQHHQEYIQEI IH<br>SQIPLDLIVHSRTIRLIPVLARVSTHSIITAHRIQ<br>HII                                                                                                                                                                                                                                                                             |                                            |
| RBMX    | CCDS14661.1 | Sense     | 242 | KEDHHQEVGVLLLRDLHLQDQFAVAVEWEEELLYH<br>VEEIVMEVHLEGNRCPLVEMFICPQEMMGILLKTA<br>IQAEITQVLVILEIMHHHHEIILTVMVIPVHVMT<br>IHQEDIAIEMDMVVIVTIQIIQVEVPTEIHMVMV<br>THVVLHLHEGPRHLMVEAVAMMITAAHVTDMEVE<br>TVTQAAEVISTQVVVIGLADKKEGFLLWKGGTLL<br>HVIPTAVQAAEHQEVVAVEEADLIEGEAEADT                                                                                                                                                                                                              | Supported by<br>NM_001164803               |
| ALG9    | CCDS41714.1 | Sense     | 138 | WISEFQCSLCFGSPSPPTTDFSYGIPAAEISCSEFR<br>PPVLAYLGSNVYLVYNFLHPASQRGEISFPCVSTY<br>MSLWRCGSLCTSAQFSVLPMLPLCVSTISPGALY<br>CDIELAGIRNCLPVWALVIFSLCGTVQRISRAP                                                                                                                                                                                                                                                                                                                              |                                            |
| SLC35F3 | CCDS1600.1  | Sense     | 242 | GGSEMVALRGGSHQRAGGAHVHRGADPAHHWLWL<br>PALGSELQKGGAPPGLPGPGGGPGTGRGGGRRESE<br>SPLLDVLPGATQEDLLGRGGRAVRVLLVGGLHAAR<br>QADLQEVRRALHPHVCHQLELFLPVVLRGARLQ<br>VHREAVCEAAIQGMLSIFWRQWLD FEGVFYQGSTL<br>WCSLDTHKLPVLT CNKENKHYGCLRVLLQQSFCV<br>LALMDRSQGQIHGSEDCGRHPRHRWHCDDDLR                                                                                                                                                                                                            |                                            |
| SRCAP   | CCDS10689.2 | Sense     | 421 | SCVLYSLSSIVFTPHLCPHHTSCPSLGSTHHPHL<br>SPLDCFCFGPSSVDQCDSTIGTCCPSGSWTSLTGT<br>IWCFFVVISLDSRFHGHSSIPVFISDTWSPSVVGSH<br>LFTCSRVELNRGPSMLTCTPGASFSGQSFSVSTKS<br>SSSSGFPSSGSSIFCISGSSHPSGSYGGSTDSNGS<br>FSSSSSGSSSGPGTIARCCSCPGFITDSGSSYGS<br>VYSRNLFSLSFTGTSSNPCVSGSIINSNYATSPGSV<br>TSPEPGFYADTGPSPSPSTHWRLLISISDTLFGNG<br>EPPGTLNSDIVINSSIIIPGTNSSPDTVFGTRTTT<br>GSNSDAVSGSSTPSGSSFSGSPSSHADFGSSIV<br>ICFTPGPSFSADTDLEPCPSSYPGPGRSSDLGAGP<br>SLHTVPSFPGIFPCGFGIWCRSLACHHGIPACFCQ<br>G |                                            |
| FOXP2   | CCDS43635.1 | Sense     | 186 | WASSQHICSACVSGHDDSPGDHPSANAADPSATSP<br>VSSAATSPSPTTAGCHAAAATTRVLQETARAVTS<br>SAFAAAAAATAAATTAATTAATTTTTAATTAATAA<br>ATAAAAAATASWKASERAAAAAAATAIGSPAACLP<br>AAASP DATTPAAAASAQPSASGTHLHSTWPGSTSC<br>PIAASSWLKSC                                                                                                                                                                                                                                                                      |                                            |
| SMG7    | CCDS1355.1  | Sense     | 188 | LPVHPHSSPWSLPPSSQARVSAPNICYPACGIF<br>YGLRLHLPSWCFCPRNLSSAYSSLSRKPASWET<br>VPHSLQPATALWTRANEPGTSTITATFPATPYIFT<br>SSANSTVYKPAAGSSSNSATTIPYKSCAGFGEKPA<br>SPLWIPAVSTGRCLQTAVESPSGSRPIRENYACET<br>ALLPSDPRPHKTV                                                                                                                                                                                                                                                                        |                                            |
| KLHL31  | CCDS34478.1 | Antisense | 208 | LVVLRPLVELGAEALDALLVLLALVPAPHQVGAA<br>MQRRDARSASHLQRRRVAPLAGRGAVALHGEHVH<br>ALPARPQLAAAHVHVAQRDRAPAPGCAEVRQL<br>LPRVAGRUVGAHRARVGVGYVASGHQHAAGDRAS<br>VAAARHLQGRRLPLLIGGGHVALQRGQASFCVAAA<br>RGVHEPVEHAQAEVRALLVHAGQVYPGVEAGIV                                                                                                                                                                                                                                                      |                                            |
| TRPC3   | CCDS3725.1  | Antisense | 210 | VAEGVVPLLLHAPALAEIVVRPLDPGTLHQQHVH<br>HFVFLAVRRQDDGGDVRREARVLVVSVEVVVLQL<br>LLTGAQSETLAGREARVVEDGLYDAHVALADGEQQ<br>GVANARQVLLLEQQGLHLQVLVAHSQLQRVLAHV<br>HAVDVQRLGLLQHLAHHWDVAVLGGVEEALLLGE<br>AGAAVIEHEGRAPDSLAPALLPHHCHASQGWASLH                                                                                                                                                                                                                                                  |                                            |
| ALKBH5  | CCDS42272.1 | Antisense | 256 | EHSASPAAHRQGHWFHHPNRLELELAEEAQRVA<br>KEGHGHDGALEDVDGVHVRHDAAGLVVDDGAVD<br>EALGDDAVLHQLLDHQLVHPLGDLVHVARRVEALL<br>AGPALLQLGAVSVAFAEVVLVAQWGPVHRVLLVQA<br>LLSAGHHLVNAGLDLGALVLAEEAHLADAALHLAR<br>LLLLLQLLLLIVAALGVRVLLILALGPGHRVRFGG<br>SGGCGCGYGGCGSGGGLPAARLIVVPGRHGLELL<br>TQVRVAAGGRH                                                                                                                                                                                             | Evidence for<br>antisense<br>transcription |

|         |             |           |     |                                                                                                                                                                                                                                                                                                                                                                                                                                           |                                                                                               |
|---------|-------------|-----------|-----|-------------------------------------------------------------------------------------------------------------------------------------------------------------------------------------------------------------------------------------------------------------------------------------------------------------------------------------------------------------------------------------------------------------------------------------------|-----------------------------------------------------------------------------------------------|
| RSBN1   | CCDS862.1   | Antisense | 234 | SLGGFDQRHPSSPLAVFLVLVLEIGSAGAGITIG<br>AAVVMVLVPLLVALMLGPGRAHRQRREGEGRGAW<br>GRERGSDSGPGGCQRRWRRRRQEKRLNRAWDSWGC<br>IRWRQRPRLAAATPPVRGSEGLLARPPPLLRP<br>PTARSALPFNSPRGDPMSMRFLPLFVRLRLRRHRP<br>YYAHRSDLRSHFTHKHTFKWPDPRPPVRASRKRPR<br>TARWALESLLRPPLVGRSSSRDEH                                                                                                                                                                             |                                                                                               |
| SON     | CCDS13629.1 | Antisense | 384 | TEISSATVATGCPGNSGAPGCPGNSSTPVARGCPK<br>SSSAPAAPDCPENSSAPAAMSGPGNSSAPVATGCP<br>DNSSALVAEGSPGNSGTPVTEGCPGNSSAVVATGC<br>PGNSSTIVASGCPSPNPVAVVTSGCPGCSTVVIPTG<br>CSNSVVVTGCSVNSIATVTAGCSGNSTAAVTKGSP<br>GNSCAITGGSGTSCGGSNPMDGAGSPGNSCDNCGT<br>GVTEGPGNSGTAVAGGPGNSGTGVERGPGNSGTGV<br>AEGPGNSSTGVTGGPCNSGMEVAGGPGNSIAEATD<br>DSCSSNAVVLGSSGNSCGLVMDESAISDGTSTGCS<br>GNLSASIADDSGKSIVVDVLGSGYTSVGVSDDTTR<br>VSEGSNTFATGGSTNMIFDGSGDVLSTDFSTDFI | Hit to PRK07003<br>(DNA PolIII<br>subunit) domain,<br>weak similarity to<br>collagen proteins |
| TNKS    | CCDS5974.1  | Antisense | 209 | AAKCRGEDFRPAMSFATFAASTSLFTRDTSPLRQ<br>ASSSSRRAPLTAGTPVPGPAAPGPSGAVLLTPAAS<br>GLSAKLDPGEDGEDEEEVGEEDDGELELLPLPAG<br>LGATPAADEVETAGTTGAAATVQIVLVVLQQLVPS<br>TGSGDRGLSGGSRLPSPSGSARPCRGEAKGARPLA<br>VGEAGVVPGARPGLSGGGGGGGAEAPGAGWSCC                                                                                                                                                                                                        |                                                                                               |
| FAM135A | CCDS34481.1 | Antisense | 197 | VSLSTVGISEYICVRFNTSLFFFIVLSSLTSVLE<br>MEPEMTQGVPKQISFEFNVIAPVELLDLSGLWKP<br>LHIVSKLGLELQLLFTSLEVSSSEKTNCKGSLMLE<br>FKECIATVSLSKFPENTTLCCCKVILDFLVSSHFG<br>KSVVPRFNTVLLSFRWHS GTTDFLEFSSGDSSSSE<br>GREFMDVKDDCISLIALVLSVQ                                                                                                                                                                                                                  |                                                                                               |

**Supplementary Table 6. Candidate novel dual-coding ORFs associated with SCEs.**

### S10. A to I editing sites in SCEs

Table S1 in the supplement of Li et al. (2009) lists fourteen previously known A-to-I recoding sites in human genes. All of these are found within CCDS ORFs, and ten lie within the 15-codon SCEs:

| Gene name     | Genomic position (hg18) | Amino acid change | SCE? |
|---------------|-------------------------|-------------------|------|
| <i>GRIA2</i>  | chr4:158477325          | Q>R               | ✓    |
| <i>GRIA2</i>  | chr4:158500744          | R>G               | ✓    |
| <i>IGFBP7</i> | chr4:57670991           | K>R               |      |
| <i>IGFBP7</i> | chr4:57671043           | R>G               |      |
| <i>CYFIP2</i> | chr5:156669386          | K>E               |      |
| <i>GRIA4</i>  | chr11:105309904         | R>G               | ✓    |
| <i>KCNA1</i>  | chr12:4892003           | I>V               | ✓    |
| <i>BLCAP</i>  | chr20:35580947          | K>R               | ✓    |
| <i>BLCAP</i>  | chr20:35580977          | Q>R               | ✓    |
| <i>BLCAP</i>  | chr20:35580986          | Y>C               | ✓    |
| <i>GRIK1</i>  | chr21:29875621          | Q>R               | ✓    |
| <i>GRIA3</i>  | chrX:122426643          | R>G               |      |
| <i>GABRA</i>  | chrX:151108975          | I>M               | ✓    |
| <i>FLNA</i>   | chrX:153233144          | Q>R               | ✓    |

**Supplementary Table 7. Fourteen known A-to-I recoding sites from Table S1 of Li et al. (2009), ten of which lie within SCEs.**

The high-throughput sequencing approach in that study identified 54 editing sites in human ORFs, of which 48 lie within CCDS ORFs, of which 40 are novel (not included in the above list). These are listed in their Table S3. Of those forty, the following three lie within SCEs:

| Gene name    | Genomic position (hg18) | Amino acid change |
|--------------|-------------------------|-------------------|
| <i>CADPS</i> | chr3:62398847           | E>G               |
| <i>FLNB</i>  | chr3:58116841           | Q>R               |
| <i>GRIA2</i> | chr4:158477329          | None (Q>Q)        |

**Supplementary Table 8. Three novel A-to-I editing sites within CCDS ORFs identified by Li et al. (2009) lie within SCEs.**

a)

b)

| position    | 10                                                               | 20 | 30 | 40 | 50 | 60 |
|-------------|------------------------------------------------------------------|----|----|----|----|----|
| Human       | CCGTTACAAAGCGTTGTGGTACTGGAGGGTAGTACCGCAACCTTTGAGGCTCACATTAGTGG   |    |    |    |    |    |
| Guinea Pig  | CCGTTACAAAGTGTGTGGTACTGGAGGGTAGTCCCGCAACCTTTGAGGCTCACATTAGTGG    |    |    |    |    |    |
| Mouse       | CCGTTACAAAGCGTTGTGGTACTGGAGGGTAGTACCGCAACCTTTGAGGCTCACGTTAGTGG   |    |    |    |    |    |
| Rat         | CCGTTACAAAGTGTGTGGTACTGGAGGGTAGTCCCGCAACCTTTGAGGCTCACATTAGTGG    |    |    |    |    |    |
| Pika        | CCGTTACAAAGTGTGTGGTACTGGAGGGTAGTACCGCAACCTTTGAGGCTCACGTTAGTGG    |    |    |    |    |    |
| Microbat    | CCGTTACAAAGTGTGTGGTACTGGAGGGTAGTACCGCAACCTTTGAGGCTCACATTAGTGG    |    |    |    |    |    |
| Rock hyrax  | CCGTTACAAAGTGTGTGGTGGTACTGGAGGGTAGTCCCGCAACCTTTGAGGCTCACATTAGTGG |    |    |    |    |    |
| Tenrec      | CCGTTACAAAGTGTGTGGTGGTACTGGAGGGTAGTCCCGCAACCTTTGAGGCTCACGTTAGTGG |    |    |    |    |    |
| Sloth       | CCGTTACAAAGTGTGTGTGTACTG-AGGGTAGTAC-GCAACATTCGAG-CTCACGTTAGTGG   |    |    |    |    |    |
| Opossum     | CCATTACAAAGTGTGTGGTGGTACTGGAGGGTAGTCCCGCAACCTTTGAGGCTCATATTAGTGG |    |    |    |    |    |
| Chicken     | CCGTTACAAAGTGTGTGGTGGTACTGGAGGGTAGTCCCGCAACCTTTGAGGCTCATATTAGTGG |    |    |    |    |    |
| Frog        | CCGATACAAAGTGTGTGGTGGTACTGGAGGGTAGTACCGCAACCTTTGAGGCTCAGATCAGCGG |    |    |    |    |    |
| Tetraodon   | CCGCTCAGAGCGTGTGGTGGTACTGGAGGGTAGTCCCGCAACCTTTGAGGCTCAGTTAGTGG   |    |    |    |    |    |
| Medaka      | CCCTACAGAGCGTTGTGGTGGTACTGGAGGGTAGTCCCGCAACCTTTGAGGCTCAGTCAGTGG  |    |    |    |    |    |
| Zebrafish   | CCGCTCAGAGCGTTGTGGTGGTACTGGAGGGTAGTCTGCAACCTTTGAGGCTCAGTTAGTGG   |    |    |    |    |    |
| Lamprey     | CCCTCAGAGCGTGTGTGGTGGTACTGGAGGGTAGTCTGCAACCTTTGAGGCTGAAATTAGTGG  |    |    |    |    |    |
| fold        | (((((...(((((...))))))))))...((...))...))))))                    |    |    |    |    |    |
| pair symbol | ab cde fg hijklmnopqr rqpnm lkjih hi ih gfedcba                  |    |    |    |    |    |

c)

20



since EvoFold is influenced by conservation and sequence composition, both of which are obviously different in SCEs compared to other coding regions. Therefore, we also undertook a more carefully controlled thermodynamic stability analysis.

**RNA thermodynamic stability analysis.** We used RNAz (Gruber *et al.* 2010) to calculate the “consensus minimum free energy” (consensus MFE) in the SCEs and random controls. RNAz is based on the RNAalifold algorithm (Hofacker *et al.* 2002) that predicts the optimal folding energy by incorporating phylogenetic information (such as consistent or compensatory mutations) into the classical energy model. Following the convention for MFEs of single sequences, lower (i.e. more negative) consensus MFE indicate a more stable/more conserved RNA secondary structure in an alignment. As control sets we (i) chose random coding regions in the genome with comparable length distribution and total number, (ii) shuffled the codons in the alignments by extending the algorithm introduced in Washietl & Hofacker (2004), and (iii) simulated random alignments with the same average dinucleotide content (Gesell and Washietl 2008).

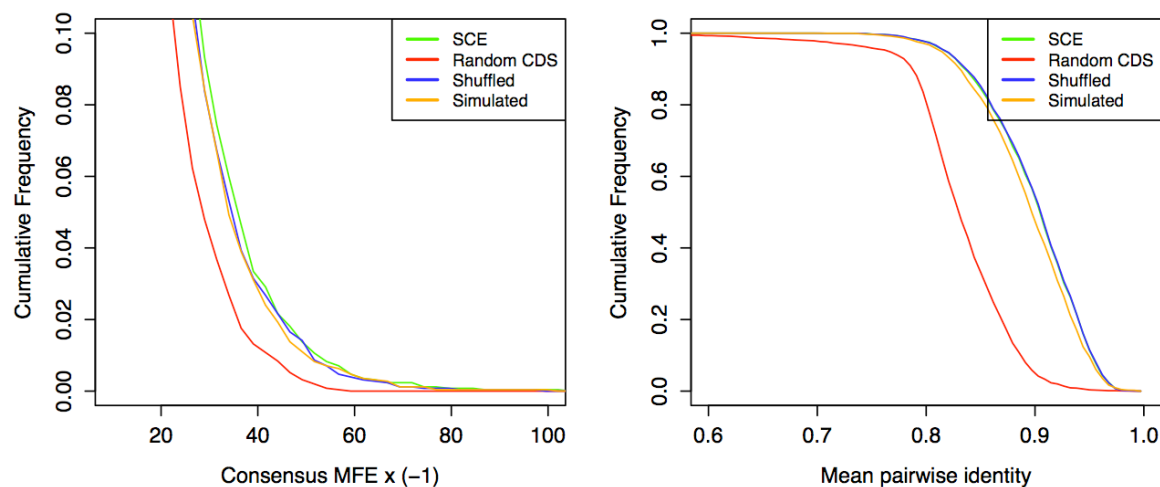

**Supplementary Figure 4. Consensus minimum free energy (MFE) and mean pairwise identity distributions for 15-codon SCEs and control sets. The SCEs were extended by flanking regions of 15 nucleotides since the boundaries of the predicted constrained regions are unlikely to correspond exactly to potential RNA structures. Similar analysis with the other SCE prediction sets and flanking regions of 30 nucleotides gave comparable results (not shown).**

Although the consensus MFE distribution for SCEs is better than random coding regions, it is not distinguishable from shuffled and simulated controls. Therefore, the difference between the SCEs and random coding regions is probably largely explained by the difference in sequence composition and conservation levels to which the consensus MFE is relatively sensitive. From these results it is unlikely that the SCEs contain a high fraction of extremely stable RNA secondary structures. Structural clustering of the EvoFold predictions within SCEs also did not reveal compelling families comparable to those discovered in non-coding regions.

It should be noted that the power of this analysis is severely limited by the high conservation levels (around 90% mean pairwise identity) and the corresponding lack of information from mutational patterns. For many highly conserved alignments the analysis is effectively the same as single sequence analysis, which is generally not significant enough to detect most of the known functional RNA structures (Washietl and Hofacker 2004).

## S12. Nucleosome positioning in exons containing SCEs

To assess nucleosome positioning within exons containing SCEs, we downloaded the “Nucleosome scores profile” from <http://dir.nhlbi.nih.gov/papers/lmi/epigenomes/hgtcellnucleosomes.aspx> which is postprocessed from high-throughput sequencing of nucleosome-bound DNA in resting human CD4+ T-cells (Schones *et al.* 2008). This data provides a score for each 10bp window in the genome, indicating the total number of reads mapping at an appropriate distance upstream or downstream to indicate nucleosome occupancy.

For each CCDS exon, we computed the mean score of all the 10bp windows of which at least one-half are within the exon, and compared the distribution of this mean score for exons containing at least one-half of an SCE and other exons. For reference, we also computed the mean score in flanking introns.

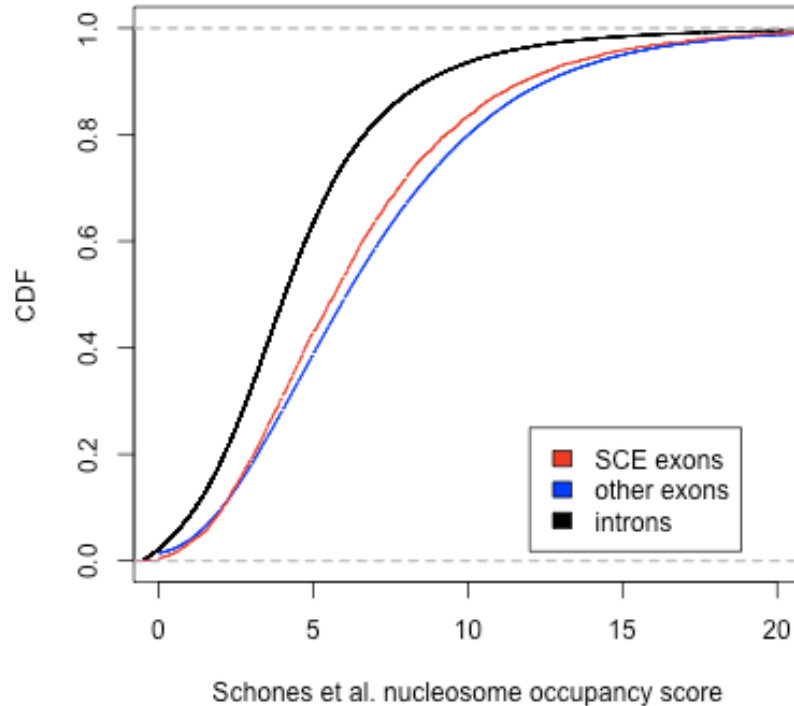

Consistent with recent reports, exons have higher nucleosome occupancy than flanking introns. However, exons containing SCEs (red, 15-codon resolution) tend to have lower nucleosome occupancy than other exons (blue,  $P = 1.0 \times 10^{-11}$ , Mann-Whitney U).

### S13. BED files for synonymous constraint elements

The BED files specifying the locations of the synonymous constraint elements are available from the following web site:

<http://compbio.mit.edu/SCE/>

### S14. References

- Arvestad L and Bruno WJ. 1997. Estimation of reversible substitution matrices from multiple pairs of sequences. *J. Mol. Evol.* **45**: 696-703.
- Benjamini Y and Yekutieli D. 2001. The control of the false discovery rate in multiple testing under dependency. *The Annals of Statistics* **29**: 1165-1188.
- Castillo-Davis C, Mekhedov SL, Hartl DL, Koonin EV, and Kondrashov FA. 2002. Selection for short introns in highly expressed genes. *Nat. Genet.* **31**: 415-418.
- Chamary JV, Parmley JL, and Hurst LD. 2006. Hearing silence: Non-neutral evolution at synonymous sites in mammals. *Nat. Rev. Genet.* **7**: 98-108. doi:10.1038/nrg1770.
- Fairbrother WG, Yeh RF, Sharp PA, and Burge CB. 2002. Predictive identification of exonic splicing enhancers in human genes. *Science* **297**: 1007-1013. doi:10.1126/science.1073774.
- Fuglsang A. 2006. Estimating the "effective number of codons": The wright way of determining codon homozygosity leads to superior estimates. *Genetics* **172**: 1301-1307. doi:10.1534/genetics.105.049643.
- Galarneau A and Richard S. 2005. Target RNA motif and target mRNAs of the quaking STAR protein. *Nat. Struct. Mol. Biol.* **12**: 691-698. doi:10.1038/nsmb963.
- Galtier N and Duret L. 2007. Adaptation or biased gene conversion? extending the null hypothesis of molecular evolution. *Trends in Genetics* **23**: 273-277. doi:DOI: 10.1016/j.tig.2007.03.011.
- Gesell T and Washietl S. 2008. Dinucleotide controlled null models for comparative RNA gene prediction. *BMC Bioinformatics* **9**: 248. doi:10.1186/1471-2105-9-248.
- Goldman N and Yang Z. 1994. A codon-based model of nucleotide substitution for protein-coding DNA sequences. *Mol. Biol. Evol.* **11**: 725-736.
- Griffiths-Jones S, Saini HK, van Dongen S, and Enright AJ. 2008. miRBase: Tools for microRNA genomics. *Nucl. Acids Res.* **36**: D154-158. doi:10.1093/nar/gkm952.
- Gruber AR, Findeiss S, Washietl S, Hofacker IL, and Stadler PF. 2010. Rnaz 2.0: Improved noncoding rna detection. *Pac. Symp. Biocomput.* **15**: 69-79.
- Hofacker IL, Fekete M, and Stadler PF. 2002. Secondary structure prediction for aligned RNA sequences. *J. Mol. Biol.* **319**: 1059-1066. doi:10.1016/S0022-2836(02)00308-X.
- Kosiol C, Holmes I, and Goldman N. 2007. An empirical codon model for protein sequence evolution. *Mol. Biol. Evol.* **24**: 1464-1479. doi:10.1093/molbev/msm064.
- Lewis BP, Burge CB, and Bartel DP. 2005. Conserved seed pairing, often flanked by adenosines, indicates that thousands of human genes are microRNA targets. *Cell* **120**: 15-20. doi:10.1016/j.cell.2004.12.035.

- Li JB, Levanon EY, Yoon J, Aach J, Xie B, LeProust E, Zhang K, Gao Y, and Church GM. 2009. Genome-wide identification of human RNA editing sites by parallel DNA capturing and sequencing. *Science* **324**: 1210-1213. doi:10.1126/science.1170995.
- Pedersen JS, Bejerano G, Siepel A, Rosenbloom K, Lindblad-Toh K, Lander ES, Kent J, Miller W, and Haussler D. 2006. Identification and classification of conserved RNA secondary structures in the human genome. *PLoS Comput. Biol.* **2**: e33. doi:10.1371/journal.pcbi.0020033.
- Pond SK and Muse SV. 2005. Site-to-site variation of synonymous substitution rates. *Mol. Biol. Evol.* **22**: 2375-2385. doi:10.1093/molbev/msi232.
- Pozzoli U, Menozzi G, Comi GP, Cagliani R, Bresolin N, and Sironi M. 2007. Intron size in mammals: Complexity comes to terms with economy. *Trends in Genetics* **23**: 20-24. doi:DOI: 10.1016/j.tig.2006.10.003.
- Richard GF, Kerrest A, and Dujon B. 2008. Comparative genomics and molecular dynamics of DNA repeats in eukaryotes. *Microbiol. Mol. Biol. Rev.* **72**: 686-727. doi:10.1128/MMBR.00011-08.
- Schmid K and Yang Z. 2008. The trouble with sliding windows and the selective pressure in BRCA1. *PLoS One* **3**: e3746. doi:10.1371/journal.pone.0003746.
- Schones DE, Cui K, Cuddapah S, Roh T, Barski A, Wang Z, Wei G, and Zhao K. 2008. Dynamic regulation of nucleosome positioning in the human genome. *Cell* **132**: 887-898. doi:DOI: 10.1016/j.cell.2008.02.022.
- Siepel A and Haussler D. 2004. Phylogenetic estimation of context-dependent substitution rates by maximum likelihood. *Mol. Biol. Evol.* **21**: 468-488.
- Stanley S, Bailey T, and Mattick J. 2006. GONOME: Measuring correlations between GO terms and genomic positions. *BMC Bioinformatics* **7**: 94.
- Stark A, Lin MF, Kheradpour P, Pedersen JS, Parts L, Carlson JW, Crosby MA, Rasmussen MD, Roy S, Deoras AN, et al. 2007. Discovery of functional elements in 12 drosophila genomes using evolutionary signatures. *Nature* **450**: 219-232. doi:10.1038/nature06340.
- Storey JD and Tibshirani R. 2003. Statistical significance for genomewide studies. *Proc. Natl. Acad. Sci. U. S. A.* **100**: 9440-9445. doi:10.1073/pnas.1530509100.
- Urrutia AO and Hurst LD. 2003. The signature of selection mediated by expression on human genes. *Genome Research* **13**: 2260-2264. doi:10.1101/gr.641103.
- Washietl S and Hofacker IL. 2004. Consensus folding of aligned sequences as a new measure for the detection of functional RNAs by comparative genomics. *J. Mol. Biol.* **342**: 19-30. doi:10.1016/j.jmb.2004.07.018.
- Whelan S and Goldman N. 1999. Distributions of statistics used for the comparison of models of sequence evolution in phylogenetics. *Mol. Biol. Evol.* **16**: 1292-1299.
- Wright F. 1990. The 'effective number of codons' used in a gene. *Gene* **87**: 23-29. doi:DOI: 10.1016/0378-1119(90)90491-9.
- Yang Z, Nielsen R, Goldman N, and Pedersen AK. 2000. Codon-substitution models for heterogeneous selection pressure at amino acid sites. *Genetics* **155**: 431-449.
